# Supplementary material
Source: PubMed Central journal article supplement (PMC3427141)
Supplement: NIHMS394540-supplement-1.pdf [file NIHMS394540-supplement-1.pdf]

## ONLINE SUPPLEMENT

### ASSOCIATION BETWEEN ANNUAL VISIT-TO-VISIT BLOOD PRESSURE VARIABILITY AND STROKE IN POSTMENOPAUSAL WOMEN: DATA FROM THE WOMEN'S HEALTH INITIATIVE

**Short title:** Blood Pressure Variability

Daichi Shimbo, MD<sup>1</sup>; Jonathan D. Newman, MD, MPH<sup>1</sup>, Aaron K. Aragaki, MS<sup>2</sup>; Michael J. LaMonte, PhD<sup>3</sup>; Anthony A. Bavry, MD, MPH<sup>4</sup>; Matthew Allison, MD, MPH<sup>5</sup>; JoAnn E. Manson, MD, DrPH<sup>6</sup>; Sylvia Wassertheil-Smoller, PhD<sup>7</sup>

<sup>1</sup>Department of Medicine, Columbia University Medical Center, New York, NY

<sup>2</sup>Fred Hutchinson Cancer Research Center, Seattle, WA

<sup>3</sup>Department of Social and Preventive Medicine, School of Public Health and Health Professions, University at Buffalo – SUNY, Buffalo, NY

<sup>4</sup>Department of Medicine, University of Florida, Gainesville, FL

<sup>5</sup>Department of Family and Preventive Medicine, University of California San Diego, San Diego, CA

<sup>6</sup>Division of Preventive Medicine, Brigham and Women's Hospital, Harvard Medical School, Boston, MA

<sup>7</sup>Department of Epidemiology & Population Health, Albert Einstein College of Medicine, Bronx, NY

**Corresponding Author:** Daichi Shimbo, MD; Columbia University Medical Center

622 West 168<sup>th</sup> Street, PH 9-310; New York, NY 10032; (212) 342-4490 Fax: (646) 304-7003

Email: [ds2231@columbia.edu](mailto:ds2231@columbia.edu)

## Study Design

WHI is a multi-center study of 161,808 postmenopausal women aged 50 to 79 years consisting of overlapping clinical trials (CTs) and an observational study (OS).<sup>1</sup> Women were screened for participation in one or both of the trial components of the CT — dietary modification or hormone therapy. Women who were ineligible for, or unwilling to enroll in, these CT components were invited to enroll in the OS. The OS is a long-term prospective cohort study to identify and assess the impact of biological, lifestyle, biochemical, and genetic factors on the risk of heart disease, cancer, osteoporosis, and other major health events. CT participants were invited to join the calcium plus vitamin D (CaD) trial at their first or second annual follow-up visit, after initial randomization into the dietary modification and/or hormone therapy trials. The CT components examined multiple end points, including cardiovascular disease, cancer, and osteoporotic fractures. Women were excluded from the CTs for a variety of reasons including competing medical conditions, concerns about safety, and adherence or retention risks.<sup>1</sup> Blood pressure was measured at baseline and then annually in the CT components, but only at baseline and Year 3 in the OS. This analysis restricts the population to women enrolled in the CT components (N=68,132). Women were further excluded from the present analysis if they did not have blood pressure assessed at the baseline visit and at least two follow-up visits up to the Year 3 visit (N=6,641), had experienced an incident stroke and/or mortality event prior to their Year 3 visit (N=569), or their time to event could not be computed because they did not have a Year 3 visit or any subsequent follow-up (N=2,694), leaving a final sample size of 58,228.

## Definitions of SD and SDreg

VVV of blood pressure, the primary exposure, was defined as the SD about the participant's mean SBP across visits, where the mean is assumed to be static. SD of SBP is computed by the following formula:

$$SD = \sqrt{\frac{\sum_{i=1}^n (y_i - \bar{y})^2}{(n-1)}}$$

where  $n$  is the total number of visits (including baseline) of SBP for an individual,  $y_i$  is the SBP at each visit, and  $\bar{y}$  is the mean of SBP across visits.

VVV of blood pressure was also defined as SDreg, the SD about the participant's regression line with SBP regressed across visits. SDreg of SBP is computed by the following formula:

$$SDreg = \sqrt{\frac{\sum_{i=1}^n (y_i - (\hat{\beta}_0 + \hat{\beta}_1 * \text{visit year}))^2}{(n-2)}}$$

where  $n$  is the total number of visits (including baseline) of SBP for an individual,  $y_i$  is the SBP at each visit, visit year = (i - 1),  $\hat{\beta}_0$  and  $\hat{\beta}_1$  are the least squares estimates of the intercept and slope, and the mean (i.e., regression line) is assumed to be a linear function of time.

Conceptually, SD is the 'average' of the deviations about the mean (which is assumed to be static over time), and SDreg is the 'average' of the deviations about the regression line (which assumes a linear increase over time). Therefore in a participant whose BP does not change across visits, SD and SDreg are similar. In contrast, in a participant whose BP increases linearly over time, SD is higher than SDreg.

## **Covariates**

At the baseline visit, CT participants provided data on demographics (age, gender, race/ethnicity), cardiovascular risk factors, prevalent cardiovascular disease, and medication use. Ethnicity was determined with the following categories: non-Hispanic white, African-American/black (non-Hispanic), Hispanic, Asian/Pacific Islander, American Indian/Alaska Native, or unknown (women who indicated “other” ethnicity or did not answer the question). Education was ascertained from a range of categories from no education to doctoral degree. Smoking was categorized as current, past, or never. Height and weight was measured, and body mass index was calculated as weight in kilograms divided by height in meters squared. Physical activity was assessed by asking about the frequency and duration of walking at various intensities and 3 other types of recreational activity classified by intensity (strenuous, moderate, or light). A 12-lead electrocardiogram was performed, and the presence of left ventricular hypertrophy was determined using Minnesota code criteria. Participants were asked to bring all of their medications to the baseline visit. The product or generic name, dosage, form, and strength of the medications were transcribed from the label into the study computer database and matched to the corresponding item in a pharmacy database: the Master Drug Data Base (Medi-Span). This database includes drug names (both brand and generic), national drug codes, and a therapeutic class code provided by the American Hospital Formulary Service for both prescription and over-the-counter products. Drugs from the following classes were considered to be antihypertensive agents: angiotensin-converting enzyme inhibitors, angiotensin receptor blockers, beta-blockers, calcium channel blockers, diuretics, centrally acting antihypertensive agents, vasodilators, and combinations of these medications. The presence of high cholesterol was identified by the use of medications for high cholesterol. Diabetes was defined as a physician diagnosis plus the use of insulin or oral diabetes medication. As medication inventories were repeated at the first, third, sixth, and ninth annual visits, the use of antihypertensive agents was also determined at follow-up.

## References

1. Design of the women's health initiative clinical trial and observational study. The women's health initiative study group. *Control Clin Trials*. 1998;19:61-109.

**Table S1. Characteristics of the WHI Clinical Trial participants (n=58,228)\* by Quartiles of Visit-to-Visit Variability† of Systolic Blood Pressure**

| Participant Characteristics                                   | Quartiles of SD of Systolic Blood Pressure |      |             |      |              |      |           |      | P trend‡ |        |
|---------------------------------------------------------------|--------------------------------------------|------|-------------|------|--------------|------|-----------|------|----------|--------|
|                                                               | Q1                                         |      | Q2          |      | Q3           |      | Q4        |      |          |        |
|                                                               | <6 mm Hg                                   |      | 6-8.9 mm Hg |      | 9-12.9 mm Hg |      | ≥13 mm Hg |      |          |        |
|                                                               | N                                          | %    | N           | %    | N            | %    | N         | %    |          |        |
| Hormone therapy trial assignment                              |                                            |      |             |      |              |      |           |      |          | <0.001 |
| CEE                                                           | 937                                        | 6.5  | 1096        | 7.2  | 1241         | 8.1  | 1161      | 8.8  |          |        |
| CEE Placebo                                                   | 1060                                       | 7.3  | 1135        | 7.5  | 1211         | 7.9  | 1143      | 8.7  |          |        |
| CEE+MPA                                                       | 1785                                       | 12.4 | 1919        | 12.6 | 1985         | 12.9 | 1760      | 13.3 |          |        |
| CEE+MPA Placebo                                               | 1716                                       | 11.9 | 1837        | 12.1 | 1882         | 12.2 | 1646      | 12.5 |          |        |
| Not randomized (dietary modification trial participants only) | 8933                                       | 61.9 | 9221        | 60.6 | 9066         | 58.9 | 7494      | 56.8 |          |        |
| Dietary modification trial assignment                         |                                            |      |             |      |              |      |           |      |          | 0.38   |
| Intervention                                                  | 4200                                       | 29.1 | 4353        | 28.6 | 4343         | 28.2 | 3635      | 27.5 |          |        |
| Control                                                       | 6364                                       | 44.1 | 6623        | 43.5 | 6612         | 43.0 | 5513      | 41.8 |          |        |
| Not randomized (hormone therapy trial participants only)      | 3867                                       | 26.8 | 4232        | 27.8 | 4430         | 28.8 | 4056      | 30.7 |          |        |
| Race/ethnicity                                                |                                            |      |             |      |              |      |           |      |          | <0.001 |
| White                                                         | 12083                                      | 83.7 | 12703       | 83.5 | 12829        | 83.4 | 10605     | 80.3 |          |        |
| Black                                                         | 1210                                       | 8.4  | 1317        | 8.7  | 1433         | 9.3  | 1535      | 11.6 |          |        |
| Hispanic                                                      | 558                                        | 3.9  | 607         | 4.0  | 524          | 3.4  | 487       | 3.7  |          |        |
| American Indian                                               | 54                                         | 0.4  | 60          | 0.4  | 69           | 0.4  | 50        | 0.4  |          |        |

|                                  |       |      |      |      |      |      |      |      |        |
|----------------------------------|-------|------|------|------|------|------|------|------|--------|
| Asian/Pacific Islander           | 352   | 2.4  | 343  | 2.3  | 325  | 2.1  | 337  | 2.6  |        |
| Unknown                          | 174   | 1.2  | 178  | 1.2  | 205  | 1.3  | 190  | 1.4  |        |
| Education level                  |       |      |      |      |      |      |      |      | <0.001 |
| 0-8 years                        | 178   | 1.2  | 202  | 1.3  | 230  | 1.5  | 222  | 1.7  |        |
| Some high school                 | 433   | 3.0  | 463  | 3.1  | 610  | 4.0  | 596  | 4.5  |        |
| High school diploma/GED          | 2516  | 17.5 | 2831 | 18.7 | 2809 | 18.4 | 2550 | 19.4 |        |
| School after high school         | 5539  | 38.6 | 5891 | 39.0 | 5972 | 39.1 | 5351 | 40.8 |        |
| College degree or higher         | 5678  | 39.6 | 5732 | 37.9 | 5653 | 37.0 | 4405 | 33.6 |        |
| Antihypertensive medication use§ |       |      |      |      |      |      |      |      | <0.001 |
| Never used                       | 10040 | 69.6 | 9785 | 64.3 | 8563 | 55.7 | 4915 | 37.2 |        |
| Used at all visits               | 2438  | 16.9 | 3082 | 20.3 | 3796 | 24.7 | 4651 | 35.2 |        |
| Newly started during follow-up   | 886   | 6.1  | 1215 | 8.0  | 1738 | 11.3 | 2165 | 16.4 |        |
| Other                            | 1067  | 7.4  | 1126 | 7.4  | 1288 | 8.4  | 1473 | 11.2 |        |
| History of hypertension          | 3763  | 28.6 | 5040 | 36.6 | 6974 | 49.0 | 8940 | 70.9 | <0.001 |
| HMG-CoA reductase inhibitor use  | 855   | 5.9  | 929  | 6.1  | 995  | 6.5  | 1043 | 7.9  | 0.02   |
| Aspirin use                      | 2492  | 17.3 | 2814 | 18.5 | 2933 | 19.1 | 2868 | 21.7 | <0.001 |
| Anticoagulation use              | 48    | 0.3  | 65   | 0.4  | 81   | 0.5  | 96   | 0.7  | <0.001 |
| History of high cholesterol      | 1393  | 10.8 | 1599 | 11.9 | 1676 | 12.3 | 1829 | 15.4 | <0.001 |
| Diabetes mellitus                | 463   | 3.2  | 559  | 3.7  | 700  | 4.6  | 823  | 6.2  | <0.001 |
| Smoking status                   |       |      |      |      |      |      |      |      | <0.001 |
| Never                            | 7573  | 53.0 | 7723 | 51.3 | 7926 | 52.1 | 6749 | 51.7 |        |
| Past                             | 5701  | 39.9 | 6254 | 41.6 | 6159 | 40.5 | 5321 | 40.8 |        |

|                                                                              |             |           |             |           |             |           |             |           |        |
|------------------------------------------------------------------------------|-------------|-----------|-------------|-----------|-------------|-----------|-------------|-----------|--------|
| Current                                                                      | 1022        | 7.1       | 1063        | 7.1       | 1141        | 7.5       | 978         | 7.5       |        |
| Left ventricular hypertrophy on 12-lead ECG                                  | 555         | 3.9       | 630         | 4.2       | 821         | 5.5       | 1088        | 8.4       | <0.001 |
| History of CHD                                                               | 647         | 4.5       | 764         | 5.1       | 878         | 5.8       | 1053        | 8.1       | <0.001 |
| History of stroke                                                            | 101         | 0.7       | 109         | 0.7       | 164         | 1.1       | 195         | 1.5       | <0.001 |
| History of atrial fibrillation                                               | 452         | 3.2       | 503         | 3.4       | 612         | 4.0       | 612         | 4.7       | <0.001 |
|                                                                              | <b>Mean</b> | <b>SD</b> | <b>Mean</b> | <b>SD</b> | <b>Mean</b> | <b>SD</b> | <b>Mean</b> | <b>SD</b> |        |
| Age at screening, years                                                      | 61.4        | 6.7       | 62.1        | 6.8       | 63.0        | 6.9       | 64.7        | 7.0       | <0.001 |
| Body mass index, kg/m <sup>2</sup>                                           | 28.4        | 5.7       | 28.6        | 5.7       | 28.9        | 5.9       | 29.2        | 5.9       | <0.001 |
| Total energy expenditure from recreational physical activity, MET-hours/week | 11.2        | 12.8      | 10.7        | 12.4      | 10.7        | 12.6      | 10.4        | 12.4      | <0.001 |
| Mean systolic blood pressure,§ mm Hg                                         | 120.6       | 13.1      | 123.3       | 13.0      | 127.2       | 13.2      | 134.6       | 13.8      | <0.001 |
| Mean diastolic blood pressure,§ mm Hg                                        | 72.8        | 7.2       | 73.6        | 7.2       | 74.7        | 7.3       | 76.4        | 7.6       | <0.001 |
| Mean pulse pressure,§ mm Hg                                                  | 47.8        | 10.3      | 49.7        | 10.6      | 52.6        | 11.2      | 58.2        | 12.3      | <0.001 |
| Mean heart rate,§ beats/minute                                               | 69.8        | 7.1       | 69.7        | 7.2       | 69.7        | 7.3       | 69.3        | 7.6       | <0.001 |

\*Includes participants in the CT components with a baseline blood pressure measurement and at least two follow-up measures at Years 1, 2 or 3, and had time to event data available after Year 3.

†Represents the standard deviation (SD) from the mean calculated from systolic blood pressure from baseline to Year 3 visits.

‡Adjusted for age, race/ethnicity, and randomization assignment in the hormone therapy trial.

§Includes data collected at baseline and Years 1, 2 and 3.

||Defined by a self-reported history of treated hypertension, baseline systolic blood pressure  $\geq$  140 mmHg, or baseline diastolic blood pressure  $\geq$  90 mmHg.

**Table S2. Hazard Ratios for Stroke Per Each 5 mm Hg Increase in SDreg\* of Systolic Blood Pressure in Selected Subgroups**

| <b>Subgroup</b>                             | <b>HR (95% CI)</b> | <b>P value†</b> |
|---------------------------------------------|--------------------|-----------------|
| Main effect                                 | 1.12 (1.05 - 1.19) | <0.001          |
| Age, years                                  |                    | 0.05            |
| 50-59                                       | 1.25 (1.10 - 1.42) |                 |
| 60-69                                       | 1.15 (1.07 - 1.23) |                 |
| 70-79                                       | 1.05 (0.96 - 1.15) |                 |
| Race/ethnicity                              |                    | 0.84            |
| White                                       | 1.12 (1.04 - 1.20) |                 |
| Black                                       | 1.06 (0.91 - 1.23) |                 |
| Hispanic                                    | 1.27 (0.86 - 1.87) |                 |
| American Indian                             | 1.10 (0.62 - 1.94) |                 |
| Asian/Pacific Islander                      | 1.30 (0.89 - 1.90) |                 |
| Unknown                                     | 1.34 (0.84 - 2.12) |                 |
| Body mass index, kg/m <sup>2</sup>          |                    | 0.35            |
| < 25                                        | 1.09 (0.97 - 1.23) |                 |
| 25 - <30                                    | 1.08 (0.98 - 1.20) |                 |
| ≥ 30                                        | 1.16 (1.06 - 1.28) |                 |
| Smoking                                     |                    | 0.30            |
| Never                                       | 1.14 (1.05 - 1.24) |                 |
| Past                                        | 1.12 (1.01 - 1.23) |                 |
| Current                                     | 0.97 (0.80 - 1.18) |                 |
| Diabetes                                    |                    | 0.57            |
| No                                          | 1.11 (1.03 - 1.19) |                 |
| Yes                                         | 1.16 (0.99 - 1.36) |                 |
| Left ventricular hypertrophy on 12-lead ECG |                    | 0.07            |
| No                                          | 1.14 (1.07 - 1.22) |                 |
| Yes                                         | 0.97 (0.82 - 1.15) |                 |
| History of atrial fibrillation              |                    | 0.29            |
| No                                          | 1.13 (1.05 - 1.20) |                 |
| Yes                                         | 0.99 (0.79 - 1.25) |                 |
| History of CHD                              |                    | 0.52            |
| No                                          | 1.12 (1.05 - 1.21) |                 |
| Yes                                         | 1.06 (0.91 - 1.25) |                 |
| History of stroke                           |                    | 0.60            |
| No                                          | 1.11 (1.04 - 1.19) |                 |
| Yes                                         | 1.22 (0.88 - 1.69) |                 |

|                                                               |                    |       |
|---------------------------------------------------------------|--------------------|-------|
| Mean systolic blood pressure, mm Hg                           |                    | 0.005 |
| < 120                                                         | 1.43 (1.16 - 1.76) |       |
| 120-129                                                       | 1.23 (1.06 - 1.42) |       |
| 130-139                                                       | 1.15 (1.02 - 1.30) |       |
| ≥ 140                                                         | 1.05 (0.96 - 1.15) |       |
| Antihypertensive medication use                               |                    | 0.34  |
| Never used                                                    | 1.21 (1.06 - 1.37) |       |
| Used at all visits                                            | 1.06 (0.97 - 1.16) |       |
| Newly started during follow-up                                | 1.12 (0.98 - 1.28) |       |
| Other                                                         | 1.22 (1.03 - 1.44) |       |
| HMG-CoA reductase inhibitor use                               |                    | 0.74  |
| No                                                            | 1.12 (1.05 - 1.20) |       |
| Yes                                                           | 1.08 (0.88 - 1.32) |       |
| Aspirin use                                                   |                    | 0.66  |
| No                                                            | 1.11 (1.03 - 1.19) |       |
| Yes                                                           | 1.14 (1.02 - 1.28) |       |
| Anticoagulation use                                           |                    | 0.33  |
| No                                                            | 1.12 (1.05 - 1.19) |       |
| Yes                                                           | 0.93 (0.65 - 1.33) |       |
| Hormone therapy trial assignment                              |                    | 0.85  |
| Intervention groups                                           | 1.09 (0.97 - 1.23) |       |
| Control groups                                                | 1.08 (0.94 - 1.23) |       |
| Not randomized (dietary modification trial participants only) | 1.15 (1.05 - 1.25) |       |
| Dietary modification trial assignment                         |                    | 0.52  |
| Intervention group                                            | 1.09 (0.96 - 1.23) |       |
| Control group                                                 | 1.14 (1.04 - 1.26) |       |
| Not randomized (hormone therapy trial participants only)      | 1.09 (0.99 - 1.21) |       |

---

\*Adjusted for covariates in Model 3 (covariates are listed in the footnote in Table 1).

†P value corresponds to test of interaction. This corresponds to a k-1 degree of freedom (df) test for categorical variables (k=number of categories), a 1-df test of trend for age and body mass index, and a 1-df test between intervention and control groups of the WHI clinical trials.

**Table S3. Hazard Ratios for Stroke Per Each 5 mm Hg Increase in Visit-to-Visit Variability of Systolic Blood Pressure\* by Number of Visits Used to Estimate Visit-to-Visit Variability of Systolic Blood Pressure**

| <b>Number of visits used to estimate visit-to-visit variability of systolic blood pressure</b> | <b>HR (95% CI)</b> | <b>P trend</b> |
|------------------------------------------------------------------------------------------------|--------------------|----------------|
| 3 to 4                                                                                         | 1.02 (0.91 - 1.14) | 0.02           |
| 5                                                                                              | 1.14 (1.00 - 1.30) |                |
| 6                                                                                              | 1.19 (1.04 - 1.35) |                |
| 7                                                                                              | 1.04 (0.87 - 1.23) |                |
| 8                                                                                              | 1.35 (1.12 - 1.63) |                |
| 9                                                                                              | 1.25 (0.94 - 1.66) |                |
| 10 to 11                                                                                       | 1.44 (0.85 - 2.45) |                |

\*SDreg in Model 3 (covariates are listed in the footnote in Table 1).

## **WHI Administrative Information**

**Program Office:** (National Heart, Lung, and Blood Institute, Bethesda, Maryland)  
Jacques Rossouw, Shari Ludlam, Joan McGowan, Leslie Ford, and Nancy Geller

**Clinical Coordinating Center:** Clinical Coordinating Center: (Fred Hutchinson Cancer Research Center, Seattle, WA) Garnet Anderson, Ross Prentice, Andrea LaCroix, and Charles Kooperberg

**Investigators and Academic Centers:** (Brigham and Women's Hospital, Harvard Medical School, Boston, MA) JoAnn E. Manson; (MedStar Health Research Institute/Howard University, Washington, DC) Barbara V. Howard; (Stanford Prevention Research Center, Stanford, CA) Marcia L. Stefanick; (The Ohio State University, Columbus, OH) Rebecca Jackson; (University of Arizona, Tucson/Phoenix, AZ) Cynthia A. Thomson; (University at Buffalo, Buffalo, NY) Jean Wactawski-Wende; (University of Florida, Gainesville/Jacksonville, FL) Marian Limacher; (University of Iowa, Iowa City/Davenport, IA) Robert Wallace; (University of Pittsburgh, Pittsburgh, PA) Lewis Kuller; (Wake Forest University School of Medicine, Winston-Salem, NC) Sally Shumaker

**Women's Health Initiative Memory Study:** (Wake Forest University School of Medicine, Winston-Salem, NC) Sally Shumaker

**For a list of all the investigators who have contributed to WHI science, please visit:**

<https://cleo.whi.org/researchers/Documents%20%20Write%20a%20Paper/WHI%20Investigator%20Long%20List.pdf>
